# Supplementary material for: HIPK1 Inhibition Protects against Pathological Cardiac Hypertrophy by Inhibiting the CREB‐C/EBPβ Axis
Source: PubMed Central journal article supplement (PMC10288234; doi:10.1002/advs.202300585), 2023-04-26
Supplement: ADVS-10-2300585-s001.pdf [file ADVS-10-2300585-s001.pdf]

## Supporting Information

for *Adv. Sci.*, DOI 10.1002/adv.202300585

HIPK1 Inhibition Protects against Pathological Cardiac Hypertrophy by Inhibiting the  
CREB-C/EBP $\beta$  Axis

*Yihua Bei\**, *Yujiao Zhu*, *Meng Wei*, *Mingming Yin*, *Lin Li*, *Chen Chen*, *Zhenzhen Huang*, *Xuchun Liang*, *Juan Gao*, *Jianhua Yao*, *Petra H. van der Kraak*, *Aryan Vink*, *Zhiyong Lei*, *Yuxiang Dai*, *Huihua Chen*, *Yueyang Liang*, *Joost PG Sluijter* and *Junjie Xiao\**

**Supplementary Materials for**

**HIPK1 inhibition protects against pathological cardiac hypertrophy by inhibiting the CREB-C/EBP $\beta$  axis**

Yihua Bei<sup>\*</sup>, Yujiao Zhu, Meng Wei, Mingming Yin, Lin Li, Chen Chen, Zhenzhen Huang, Xuchun Liang, Juan Gao, Jianhua Yao, Petra H van der Kraak, Aryan Vink, Zhiyong Lei, Yuxiang Dai, Huihua Chen, Yueyang Liang, Joost PG Sluijter, Junjie Xiao<sup>\*</sup>

**Correspondence to:** Junjie Xiao (E-mail: junjiexiao@shu.edu.cn) and Yihua Bei (E-mail: beiyh36@shu.edu.cn).

## Supplementary Figures

### Figure S1

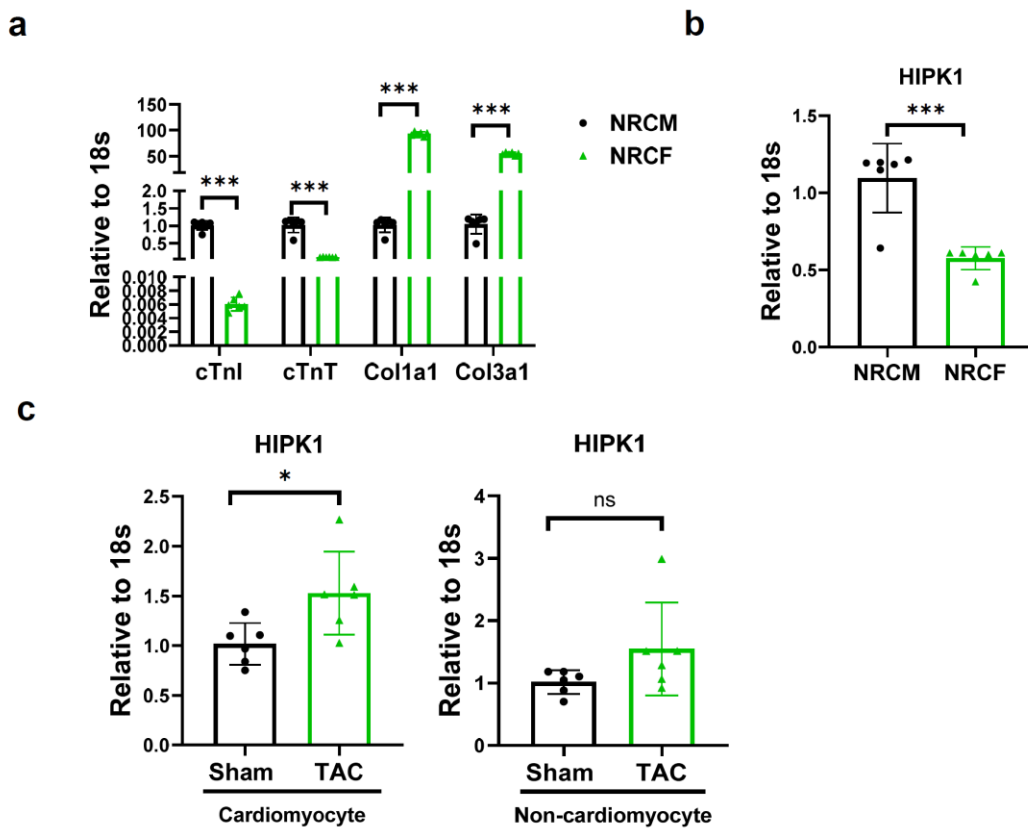

**Figure S1. HIPK1 expression in primary cardiomyocytes and non-cardiomyocytes isolated from neonatal rat or adult mice hearts. a and b, qRT-PCR for cTnI, cTnT, Col1a1, Col3a1 (a) and HIPK1 (b) in isolated neonatal rat cardiomyocytes (NRCM) or fibroblasts (NRCF) (n=6). c, qRT-PCR for HIPK1 in isolated adult mouse cardiomyocytes *versus* non-cardiomyocytes (majorly fibroblasts) from hearts post sham operation or transaortic constriction (TAC)-induced pathological cardiac hypertrophy (n=6). Data between 2 groups were compared by independent-sample two-tailed Student's t-test. \*,  $P < 0.05$ ; \*\*\*,  $P < 0.001$ ; ns, not significant.**

**Figure S2**

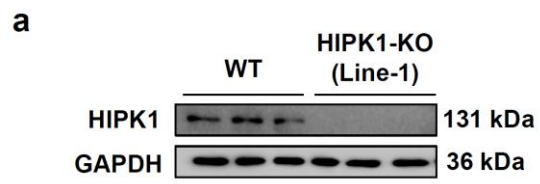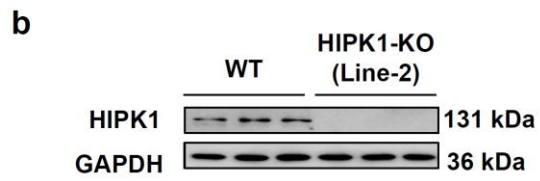

**Figure S2. HIPK1 knockout (KO) mice have ablated HIPK1 expression in heart tissues. a and b,** Western blot for HIPK1 in heart tissues to confirm HIPK1 ablation in HIPK1 KO mice (Line-1) (**a**) and HIPK1 KO mice (Line-2) (**b**) (n=3).

**Figure S3**

**a**

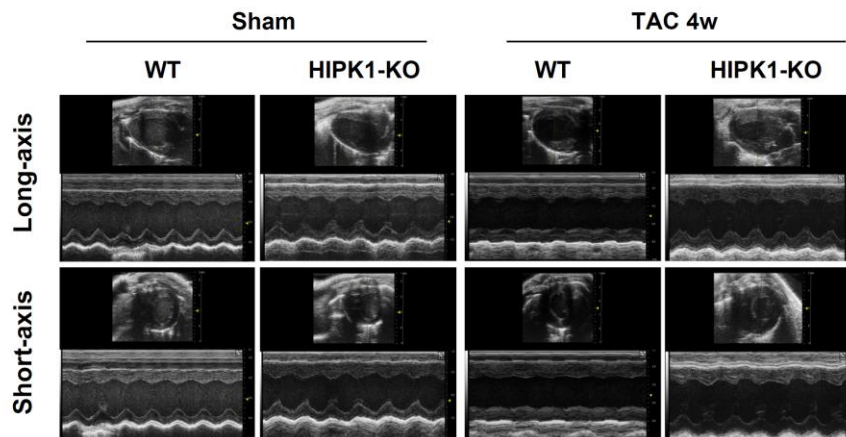

**b**

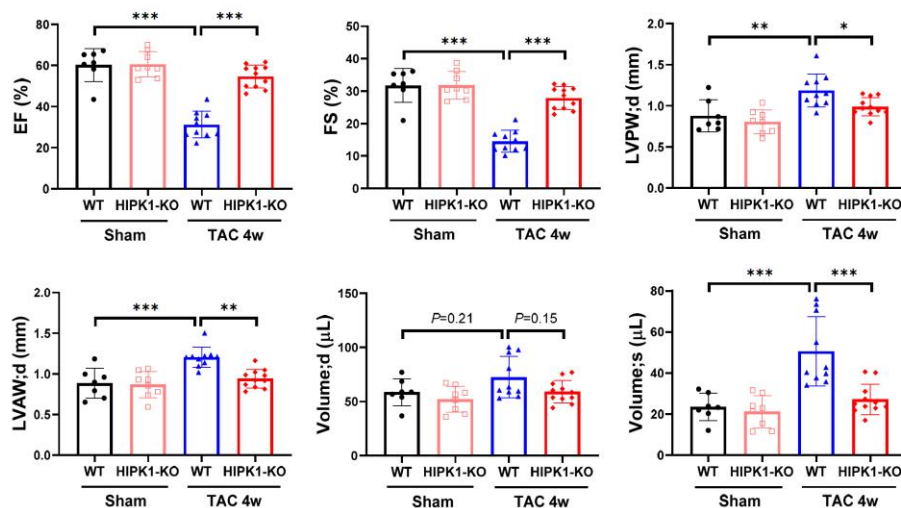

**Figure S3. HIPK1 knockout (Line-1) mice have improved cardiac function at 4 weeks after transaortic constriction (TAC) surgery. a,** Echocardiography for left ventricle (LV) systolic function of mice with representative images showing the long-axis view and the corresponding short-axis view of LV at the papillary muscle level. **b,** Statistical analysis of LV ejection fraction (EF) and fractional shortening (FS), end-diastolic LV posterior wall thickness (LVPW;d) and anterior wall thickness (LVAW;d), and end-diastolic LV volume (Volume;d) and end-systolic LV volume (Volume;s) according to measurements of three consecutive cardiac cycles from the long-axis view of LV at the papillary muscle level (n=7-11). Data among 4 groups were compared by two-way ANOVA test followed by Tukey post hoc test. \*,  $P<0.05$ ; \*\*,  $P<0.01$ ; \*\*\*,  $P<0.001$ .

**Figure S4**

**a**

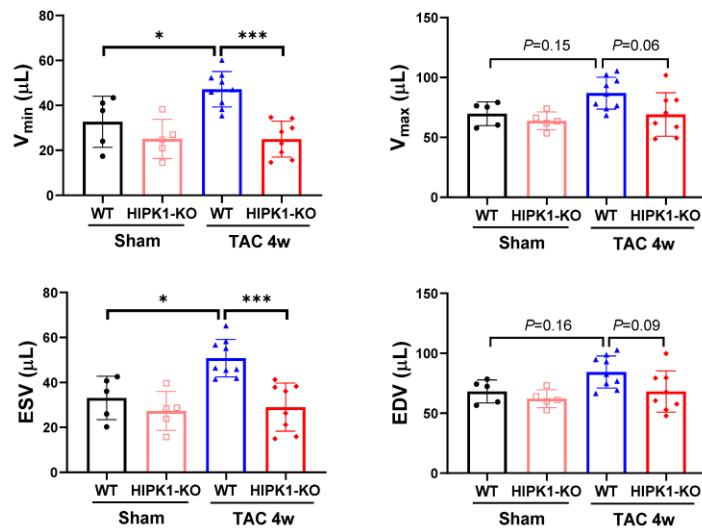

**b**

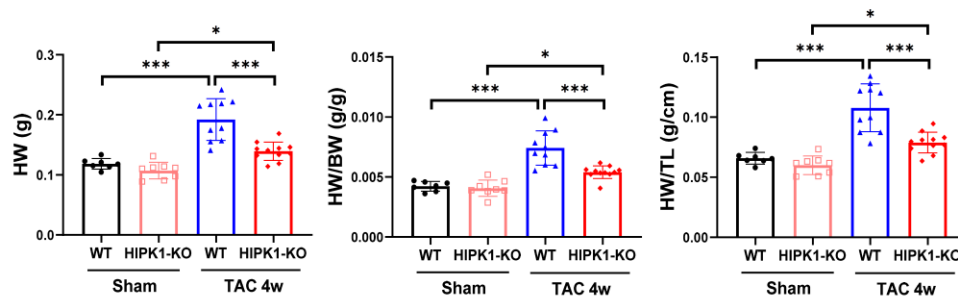

**Figure S4. HIPK1 knockout (Line-1) mice have reduced left ventricle volume and heart weight at 4 weeks after transaortic constriction (TAC) surgery. a,** Hemodynamic quantification of maximum and minimum left ventricle volume (max of volume,  $V_{max}$ ; min of volume,  $V_{min}$ ), end-systolic volume (ESV), and end-diastolic volume (EDV) (n=5-9). **b,** Heart weight (HW), heart weight/body weight (HW/BW) ratio, and heart weight/tibia length (HW/TL) ratio of mice (n=7-11). Data among 4 groups were compared by two-way ANOVA test followed by Tukey post hoc test. \*,  $P<0.05$ ; \*\*\*,  $P<0.001$ .

Figure S5

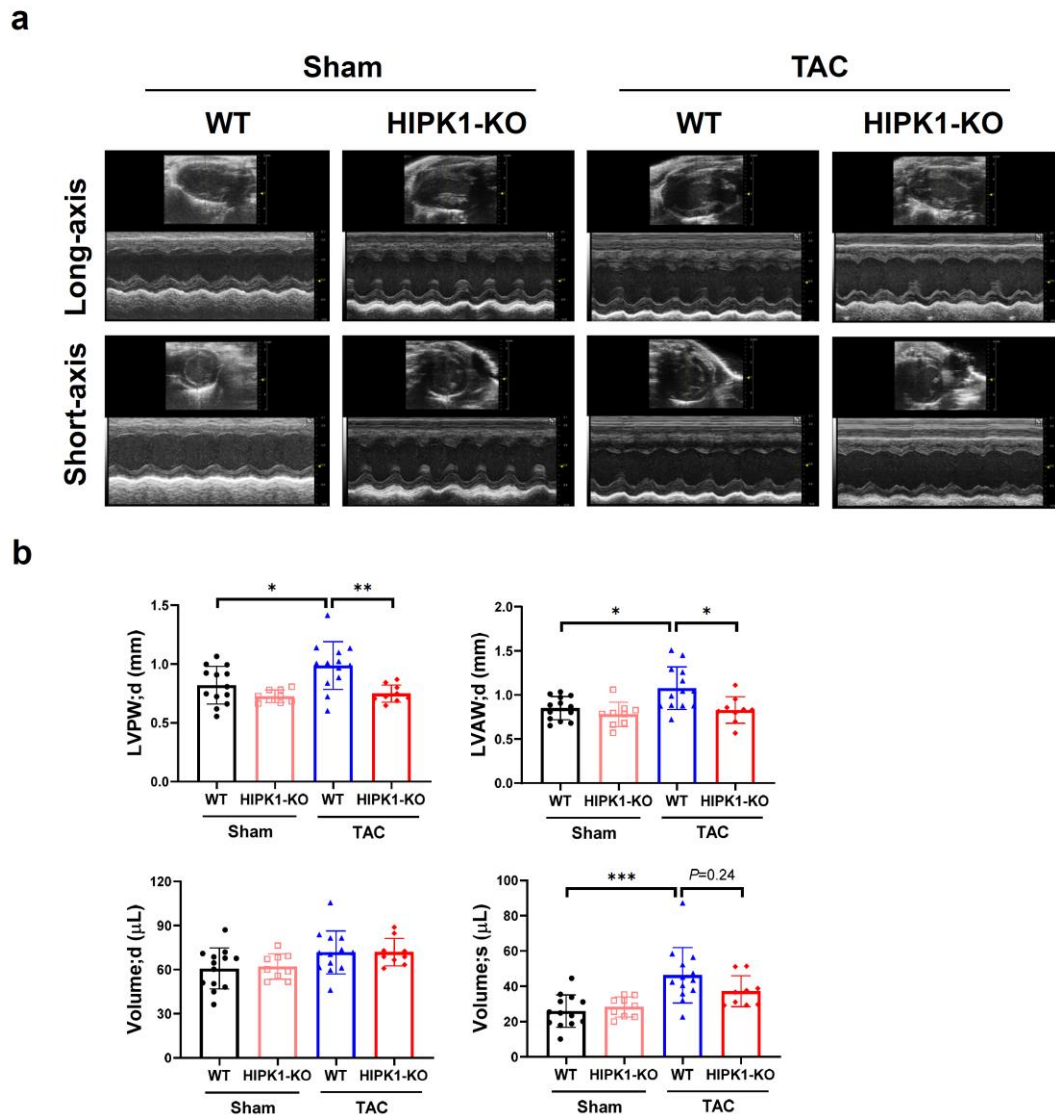

**Figure S5. Echocardiography for left ventricle (LV) cardiac function of HIPK1 knockout (Line-1) mice at 8 weeks after transaortic constriction (TAC) surgery. a,** Representative images showing the long-axis view and the corresponding short-axis view of left ventricle (LV) at the papillary muscle level. **b,** Statistical analysis of end-diastolic LV posterior wall thickness (LVPW;d) and anterior wall thickness (LVAW;d), and end-diastolic LV volume (Volume;d) and end-systolic LV volume (Volume;s) according to measurements of three consecutive cardiac cycles from the long-axis view of LV at the papillary muscle level (n=13 for WT mice, n=9 for HIPK1 KO mice). Data among 4 groups were compared by two-way ANOVA test followed by Tukey post hoc test. \*,  $P < 0.05$ ; \*\*,  $P < 0.01$ ; \*\*\*,  $P < 0.001$ .

Figure S6

a

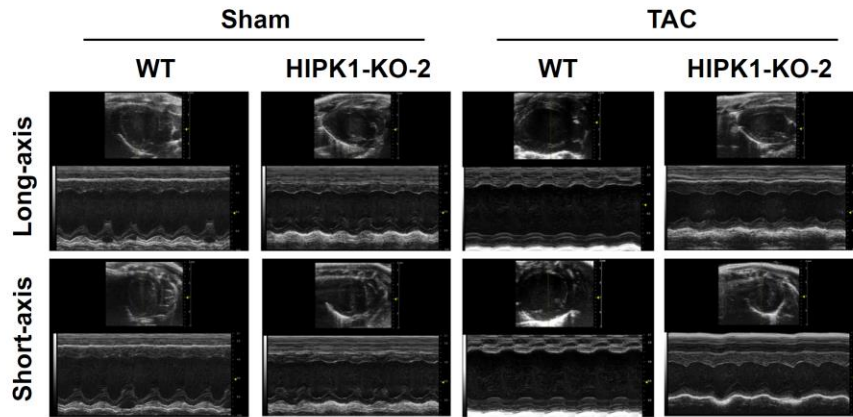

b

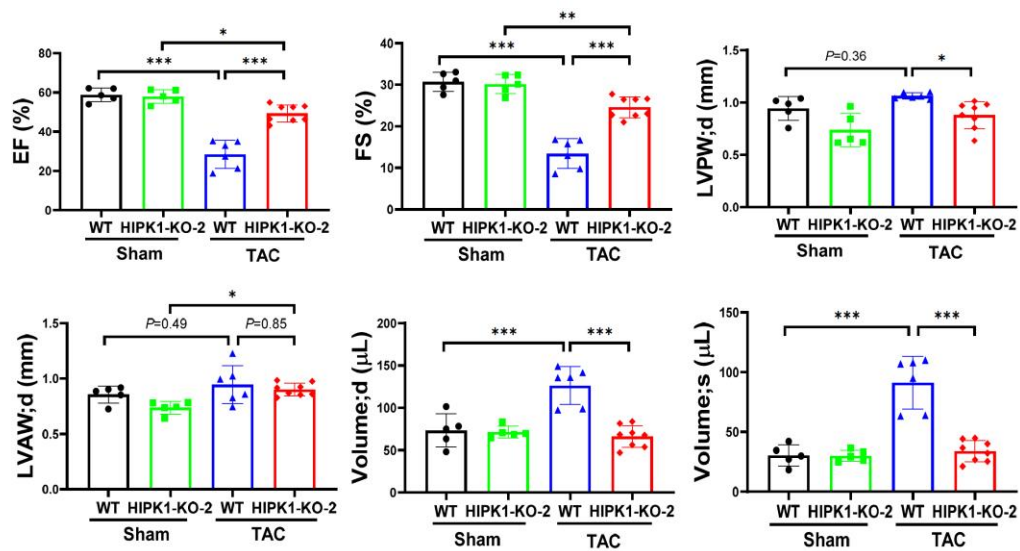

**Figure S6. Echocardiography for left ventricle (LV) cardiac function of HIPK1 knockout (Line-2) mice at 6 weeks after transaortic constriction (TAC) surgery. a,** Representative images showing the long-axis view and the corresponding short-axis view of left ventricle (LV) at the papillary muscle level. **b,** Statistical analysis of LV ejection fraction (EF) and fractional shortening (FS), end-diastolic LV posterior wall thickness (LVPW;d) and anterior wall thickness (LVAW;d), and end-diastolic LV volume (Volume;d) and end-systolic LV volume (Volume;s) according to measurements of three consecutive cardiac cycles from the long-axis view of LV at the papillary muscle level (n=5-8). Data among 4 groups were compared by two-way ANOVA test followed by Tukey post hoc test. \*,  $P < 0.05$ ; \*\*,  $P < 0.01$ ; \*\*\*,  $P < 0.001$ .



**Figure S7**

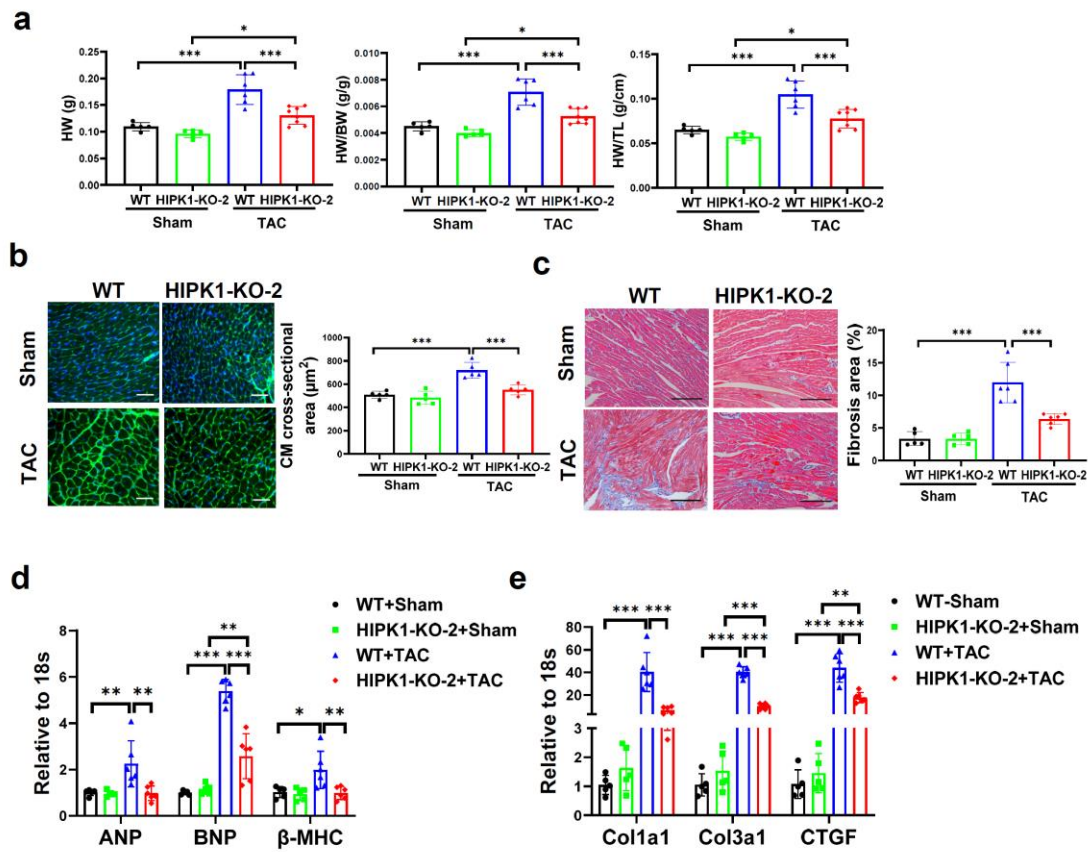

**Figure S7. HIPK1 knockout mice (Line-2) are resistant to transaortic constriction (TAC)-induced pathological cardiac hypertrophy.** **a**, Heart weight (HW), heart weight/body weight (HW/BW) ratio, and heart weight/tibia length (HW/TL) ratio of mice (n=5-8). **b**, Wheat germ agglutinin (WGA) staining for cardiomyocyte (CM) cross-sectional area (n=5). Scale bar=50  $\mu\text{m}$ . **c**, Masson staining for cardiac fibrosis area (n=5-6). Scale bar=100  $\mu\text{m}$ . **d and e**, qRT-PCR for ANP, BNP, and  $\beta$ -MHC (**d**) and Col1a1, Col3a1, and CTGF (**e**) in mice heart tissues after sham or TAC surgery (n=5-6). Data among 4 groups were compared by two-way ANOVA test followed by Tukey post hoc test. \*,  $P < 0.05$ ; \*\*,  $P < 0.01$ ; \*\*\*,  $P < 0.001$ .

**Figure S8**

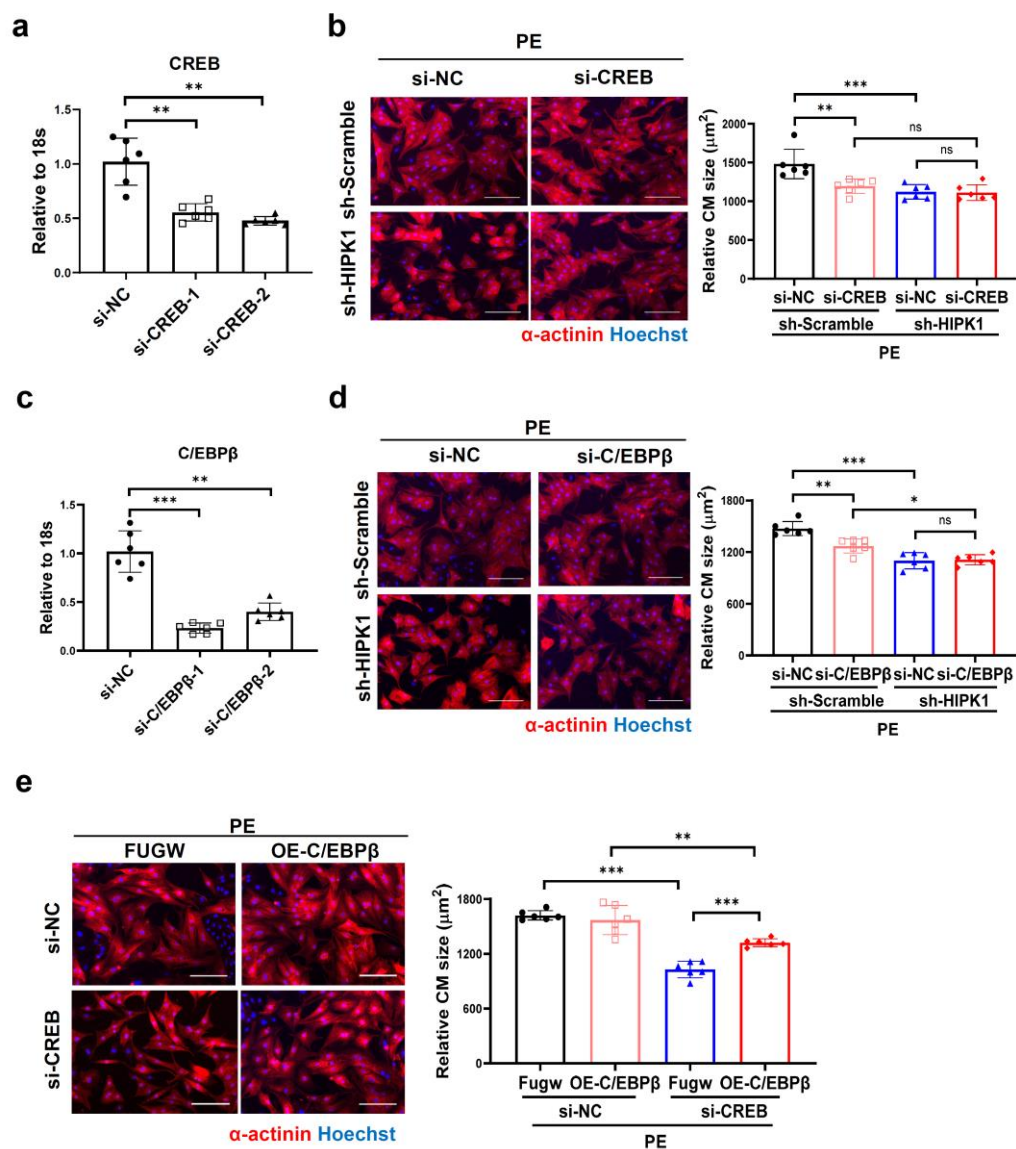

**Figure S8. Function-rescue experiments between HIPK1 and CREB-C/EBP $\beta$  axis in neonatal rat cardiomyocytes (NRCMs) under phenylephrine (PE) stress. a and c, qRT-PCR for CREB (a) and C/EBP $\beta$  (c) in NRCMs transfected with CREB siRNA, C/EBP $\beta$  siRNA, or negative control, respectively (n=6). b and d, Immunofluorescent staining for  $\alpha$ -actinin in NRCMs treated with sh-HIPK1 lentivirus and CREB siRNA (b) or C/EBP $\beta$  siRNA (d) (n=6). Scale bar=100  $\mu\text{m}$ . e, Immunofluorescent staining for  $\alpha$ -actinin in NRCMs treated with CREB siRNA and OE-C/EBP $\beta$  plasmid (n=6). Scale bar=100  $\mu\text{m}$ . Data among 3 groups were compared by one-way ANOVA test. Data among 4 groups were compared by two-way ANOVA test followed by Tukey post hoc test. \*,  $P < 0.05$ ; \*\*,  $P < 0.01$ ; \*\*\*,  $P < 0.001$ ; ns, not significant.**

Figure S9

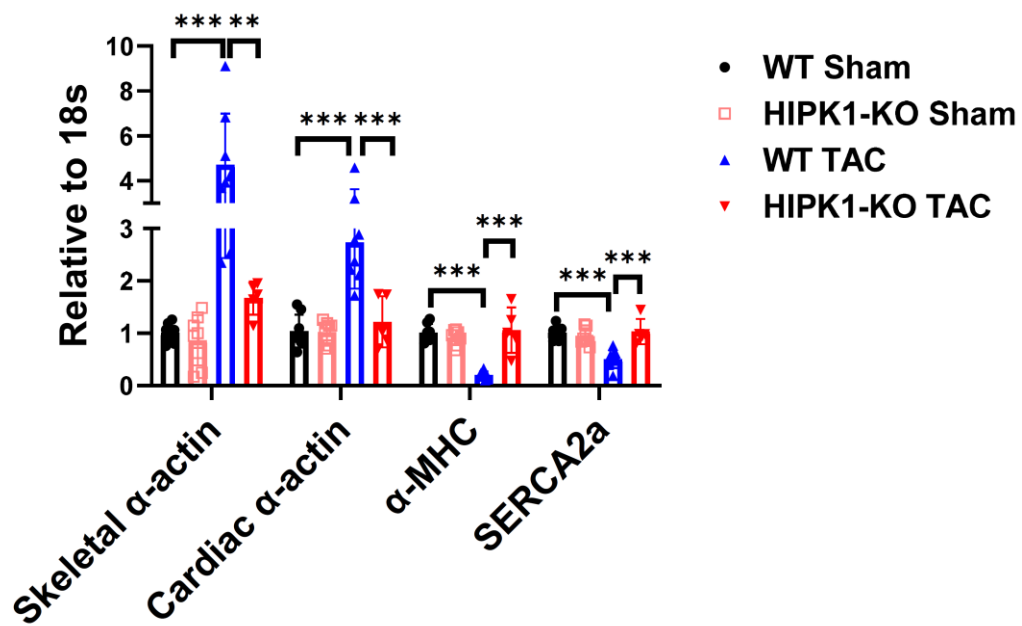

Figure S9. Suppressing HIPK1 reverses the genetic program changes associated with pathological cardiac hypertrophy. qRT-PCR for skeletal  $\alpha$ -actin, cardiac  $\alpha$ -actin,  $\alpha$ -MHC, and SERCA2a in heart tissues from WT or HIPK1 knockout mice after sham or transaortic constriction (TAC) surgery (n=5-8). Data among 4 groups were compared by two-way ANOVA test followed by Tukey post hoc test. \*\*,  $P < 0.01$ ; \*\*\*,  $P < 0.001$ .

**Figure S10**

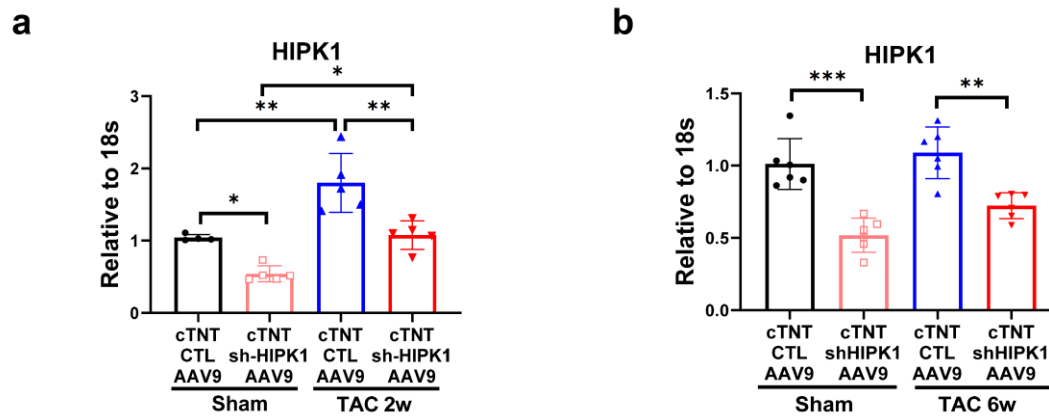

**Figure S10. cTnT-shHIPK1-AAV9 injections significantly reduce HIPK1 level in mice hearts.** Mice were treated via tail vein injections of cTnT promoter-mediated knockdown of HIPK1 AAV9 (cTnT-shHIPK1-AAV9) or control AAV9 vectors (cTnT-CTL-AAV9) and subsequently followed 1 week later by transaortic constriction (TAC) surgery to induce pathological cardiac hypertrophy. **a and b**, qRT-PCR was used to determine HIPK1 mRNA level in mice heart tissues at 2 weeks (**a**, n=4-5) and 6 weeks (**b**, n=6) after sham or TAC surgery, respectively. Data among 4 groups were compared by two-way ANOVA test followed by Tukey post hoc test. \*,  $P<0.05$ ; \*\*,  $P<0.01$ ; \*\*\*,  $P<0.001$ .

Figure S11

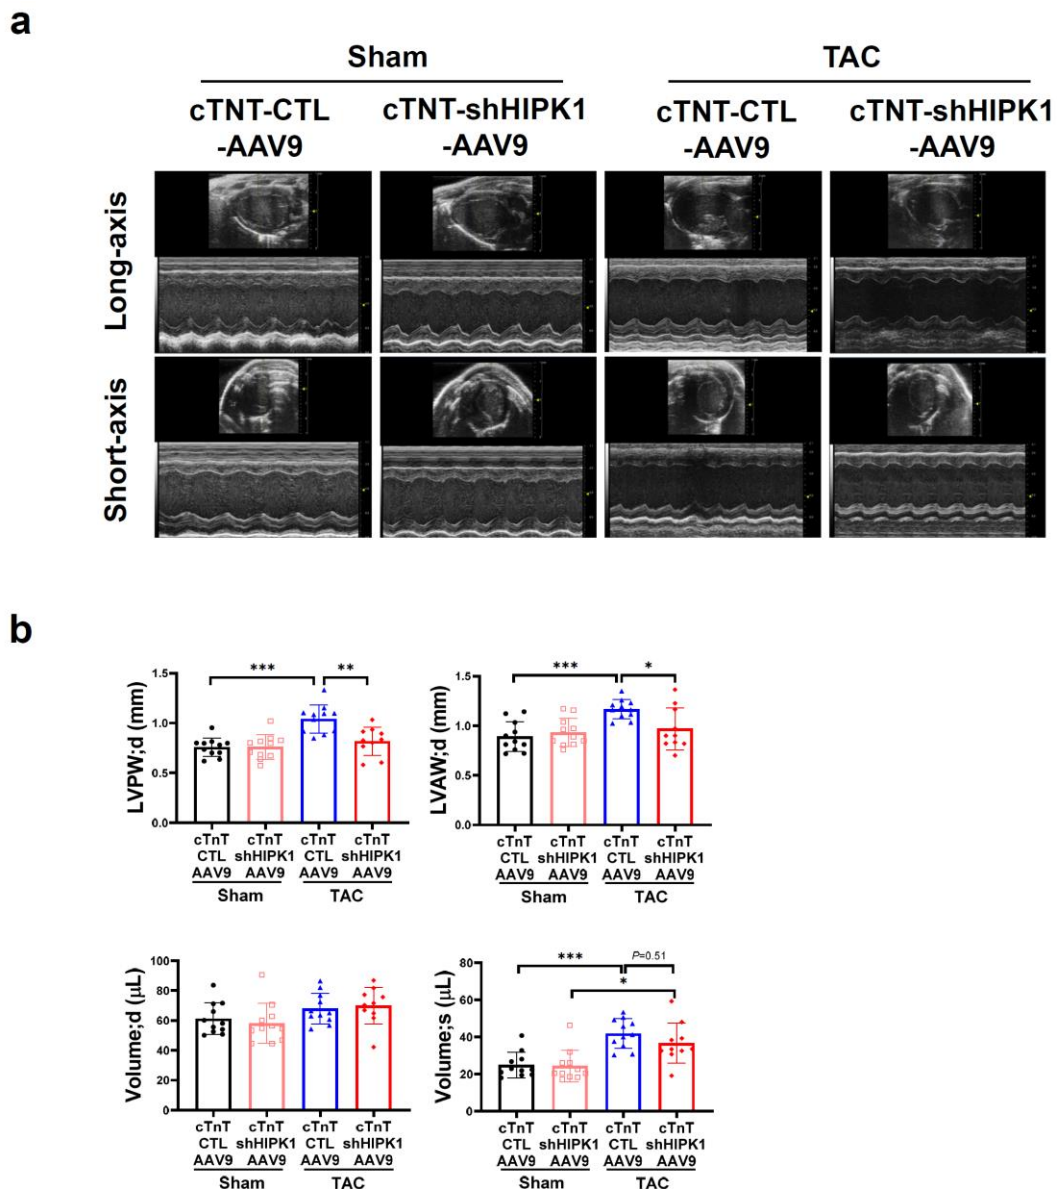

**Figure S11. Echocardiography for left ventricle (LV) cardiac function of cTnT-shHIPK1-AAV9 injected mice at 6 weeks after transaortic constriction (TAC) surgery. a,** Representative images showing the long-axis view and the corresponding short-axis view of left ventricle (LV) at the papillary muscle level. **b,** Statistical analysis of end-diastolic LV posterior wall thickness (LVPW;d) and anterior wall thickness (LVAW;d), and end-diastolic LV volume (Volume;d) and end-systolic LV volume (Volume;s) according to measurements of three consecutive cardiac cycles from the long-axis view of LV at the papillary muscle level (n=10-11). Data among 4 groups were compared by two-way ANOVA test followed by Tukey post hoc test. \*,  $P<0.05$ ; \*\*,  $P<0.01$ ; \*\*\*,  $P<0.001$ .



**Figure S13**

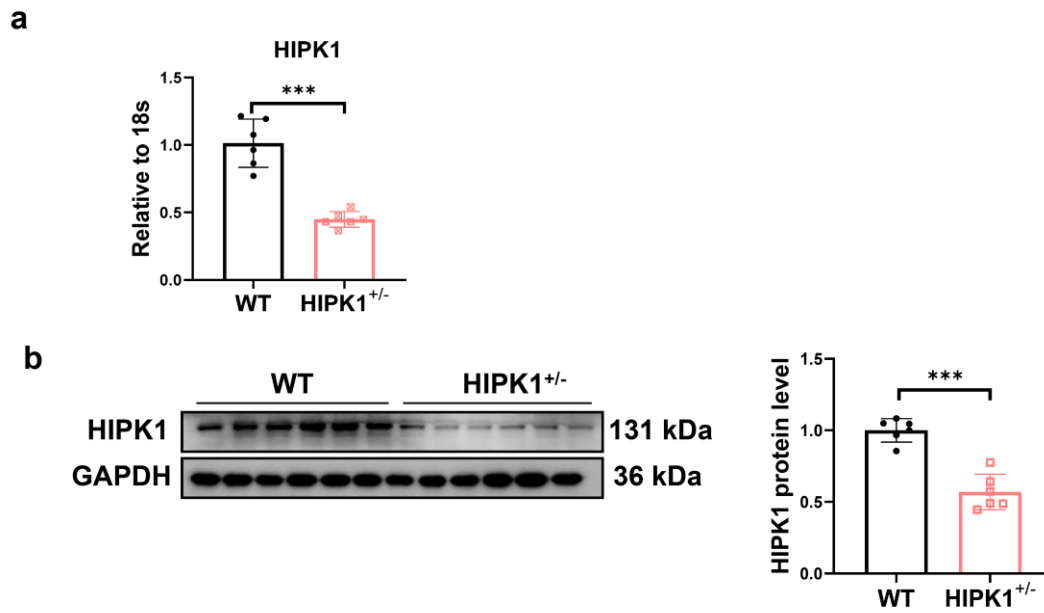

**Figure S13. Mice with hetero-knockout of HIPK1 (HIPK1<sup>+/-</sup>) have reduced HIPK1 expression in heart tissues. a and b, qRT-PCR (a) and Western blot (b) for HIPK1 in heart tissues from HIPK1<sup>+/-</sup> mice and wild type (WT) mice (n=6). Data between 2 groups were compared by independent-sample two-tailed Student's t-test. \*\*\*,  $P < 0.001$ .**



**Figure S14**

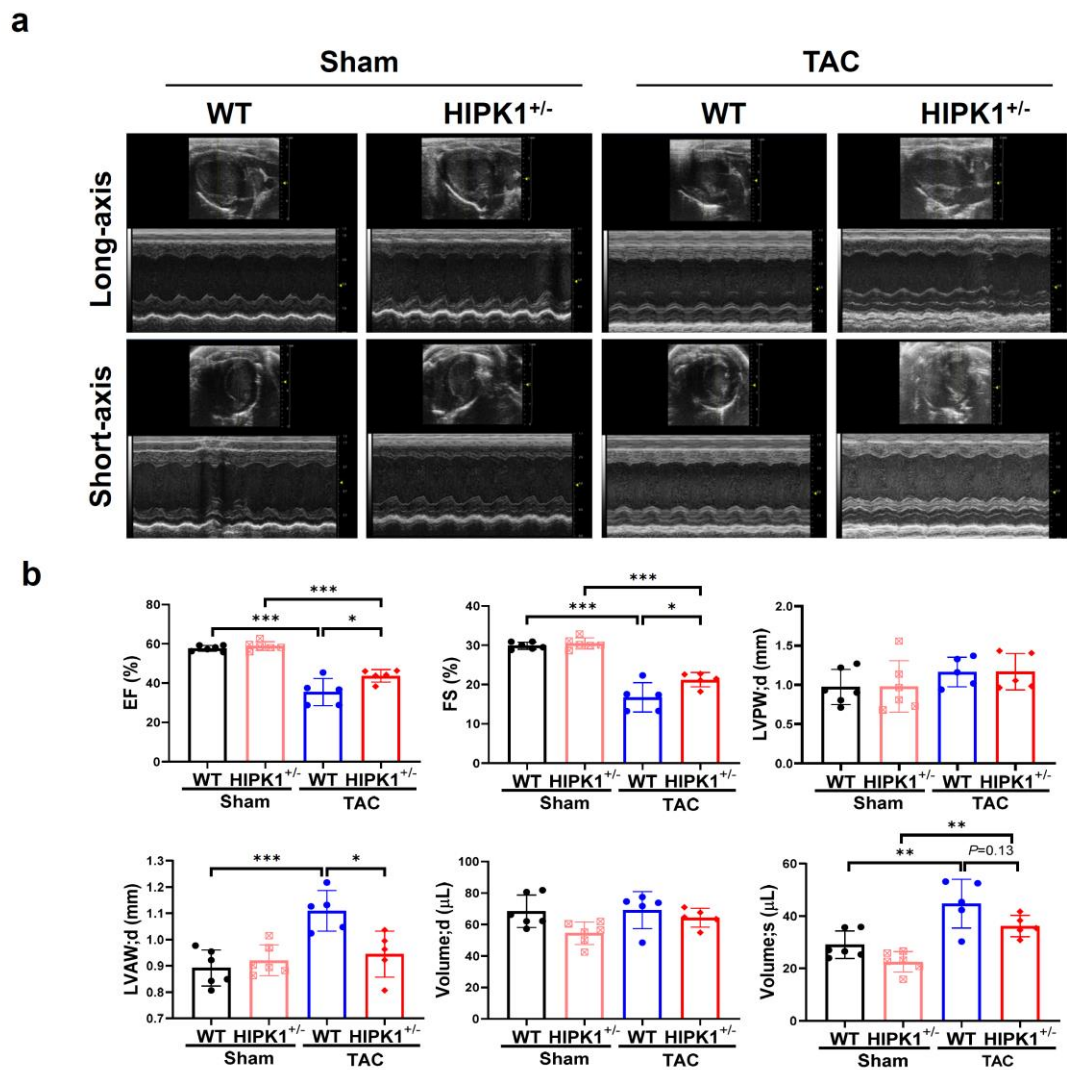

**Figure S14. HIPK1 hetero-knockout mice have improved cardiac function at 8 weeks after transaortic constriction (TAC) surgery. a,** Echocardiography for left ventricle (LV) systolic function of mice with representative images showing the long-axis view and the corresponding short-axis view of LV at the papillary muscle level. **b,** Statistical analysis of LV ejection fraction (EF) and fractional shortening (FS), end-diastolic LV posterior wall thickness (LVPW;d) and anterior wall thickness (LVAW;d), and end-diastolic LV volume (Volume;d) and end-systolic LV volume (Volume;s) according to measurements of three consecutive cardiac cycles from the long-axis view of LV at the papillary muscle level (n=5-6). Data among 4 groups were compared by two-way ANOVA test followed by Tukey post hoc test. \*,  $P < 0.05$ ; \*\*,  $P < 0.01$ ; \*\*\*,  $P < 0.001$ .



**Figure S15**

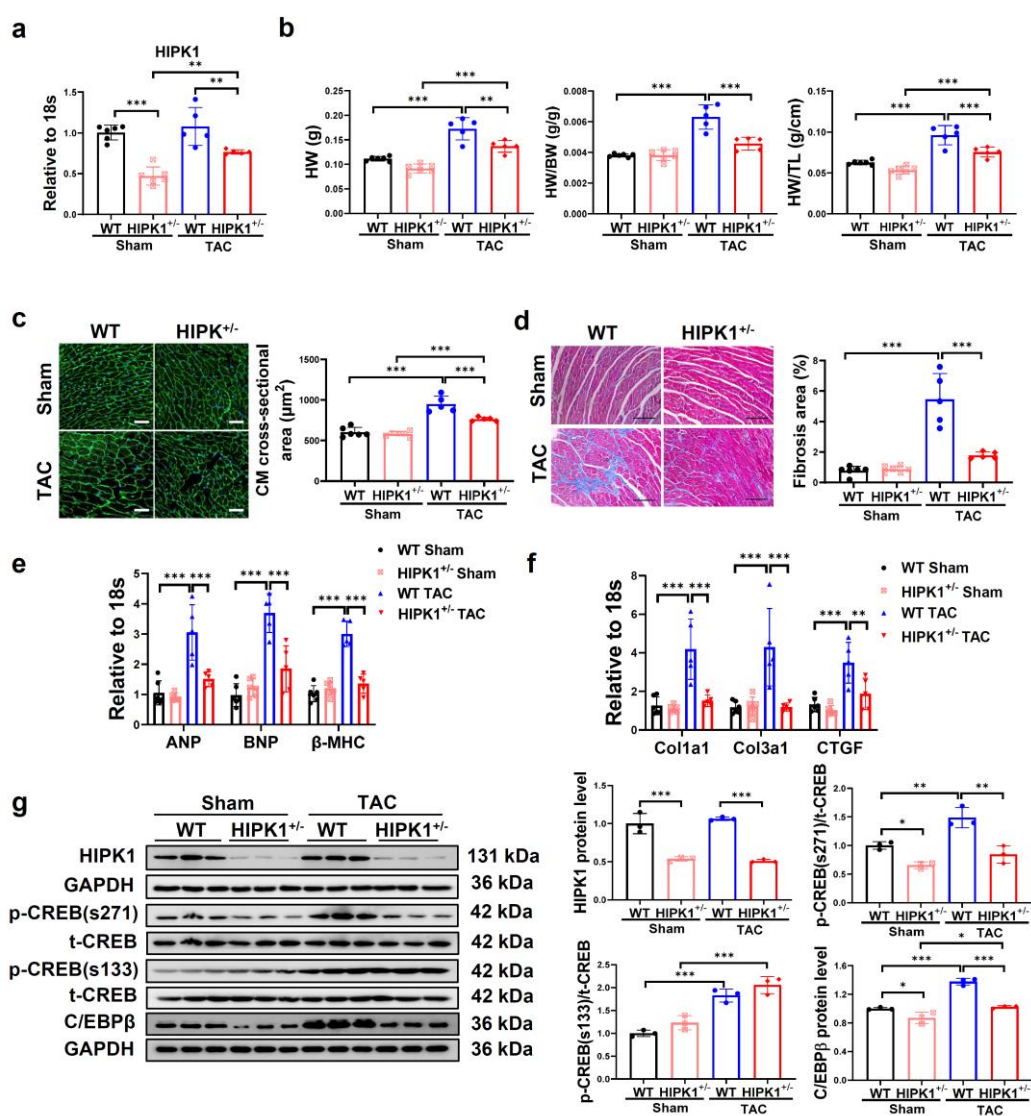

**Figure S15. HIPK1 hetero-knockout is sufficient to attenuate transaortic constriction (TAC)-induced pathological cardiac hypertrophy.** **a**, qRT-PCR for HIPK1 in heart tissues from sham-operated mice or mice at 8 weeks post TAC surgery (n=5-6). **b**, Heart weight (HW), heart weight/body weight (HW/BW) ratio, and heart weight/tibia length (HW/TL) ratio of mice (n=5-6). **c**, Wheat germ agglutinin (WGA) staining for cardiomyocyte (CM) cross-sectional area (n=5-6). Scale bar=50 μm. **d**, Masson staining for cardiac fibrosis area (n=5-6). Scale bar=100 μm. **e and f**, qRT-PCR for ANP, BNP, and β-MHC (**e**) and Col1a1, Col3a1, and CTGF (**f**) in mice heart tissues after sham or TAC surgery (n=5-6). **g**, Western blot for HIPK1, CREB phosphorylation, and C/EBPβ expressions in mice heart tissues after sham or TAC surgery (n=3). Data among 4 groups were compared by two-way ANOVA test followed by Tukey post hoc test. \*,  $P < 0.05$ ; \*\*,  $P < 0.01$ ; \*\*\*,  $P < 0.001$ .

Figure S16

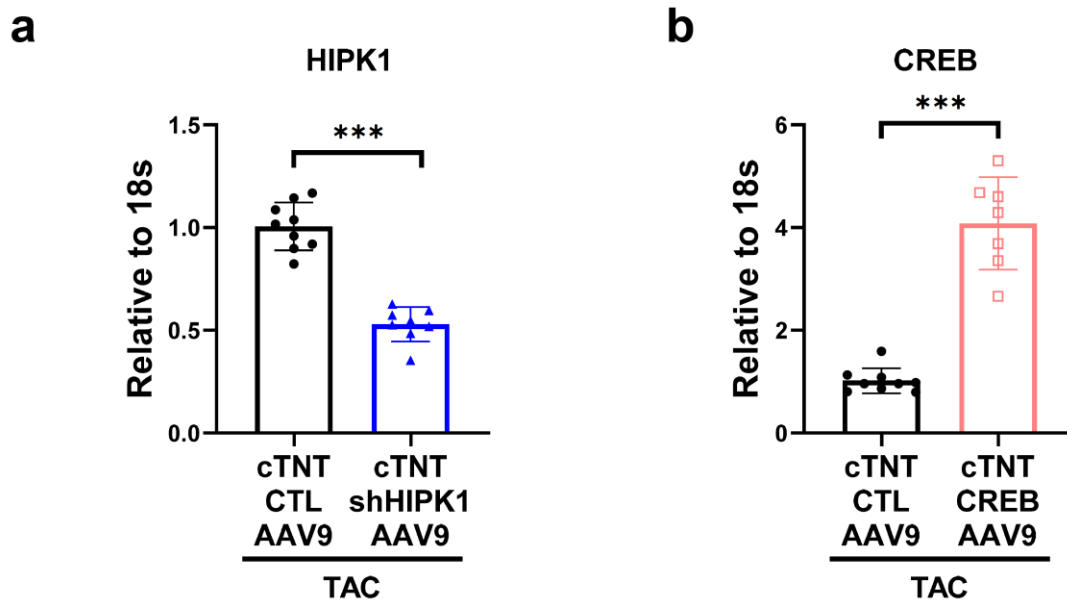

**Figure S16. Validation of AAV9-mediated gene expression changes in mice hearts.**

Mice were treated via tail vein injections of cTnT promoter-mediated knockdown of HIPK1 AAV9 (cTnT-shHIPK1-AAV9), cTnT promoter-mediated overexpression of CREB AAV9 (cTnT-CREB-AAV9), or control AAV9 vectors (cTnT-CTL-AAV9) and subsequently followed 1 week later by transaortic constriction (TAC) surgery to induce pathological cardiac hypertrophy. **a and b**, at 6 weeks post TAC, qRT-PCR was used to determine HIPK1 (**a**) and CREB (**b**) mRNA levels in mice heart tissues (n=7-9). Data between 2 groups were compared by independent-sample two-tailed Student's t-test. \*\*\*,  $P < 0.001$ .

Figure S17

a

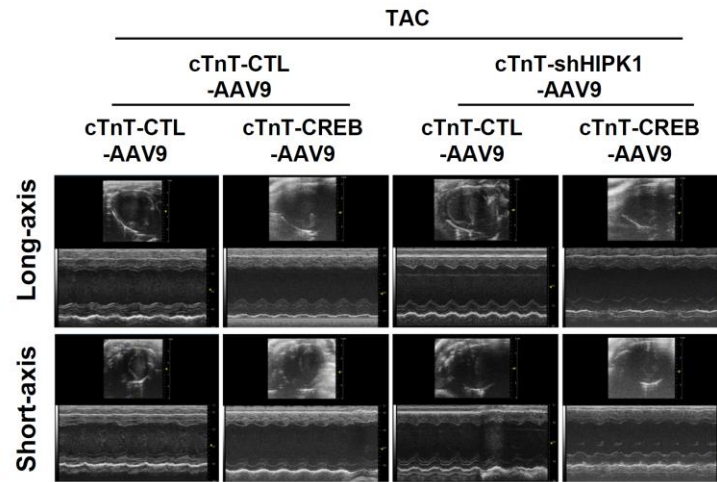

b

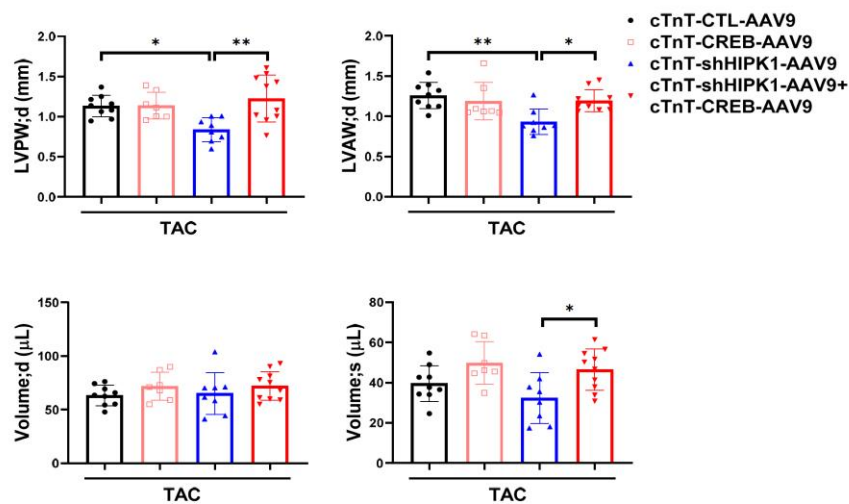

**Figure S17. Echocardiography for left ventricle (LV) cardiac function of mice with cTnT-shHIPK1-AAV9 and/or cTnT-CREB-AAV9 injections at 6 weeks after transaortic constriction (TAC) surgery. a, Representative images showing the long-axis view and the corresponding short-axis view of left ventricle (LV) at the papillary muscle level. b, Statistical analysis of end-diastolic LV posterior wall thickness (LVPW;d) and anterior wall thickness (LVAW;d), and end-diastolic LV volume (Volume;d) and end-systolic LV volume (Volume;s) according to measurements of three consecutive cardiac cycles from the long-axis view of LV at the papillary muscle level (n=7-10). Data among 4 groups were compared by two-way ANOVA test followed by Tukey post hoc test. \*,  $P < 0.05$ ; \*\*,  $P < 0.01$ ; \*\*\*,  $P < 0.001$ .**

**Figure S18**

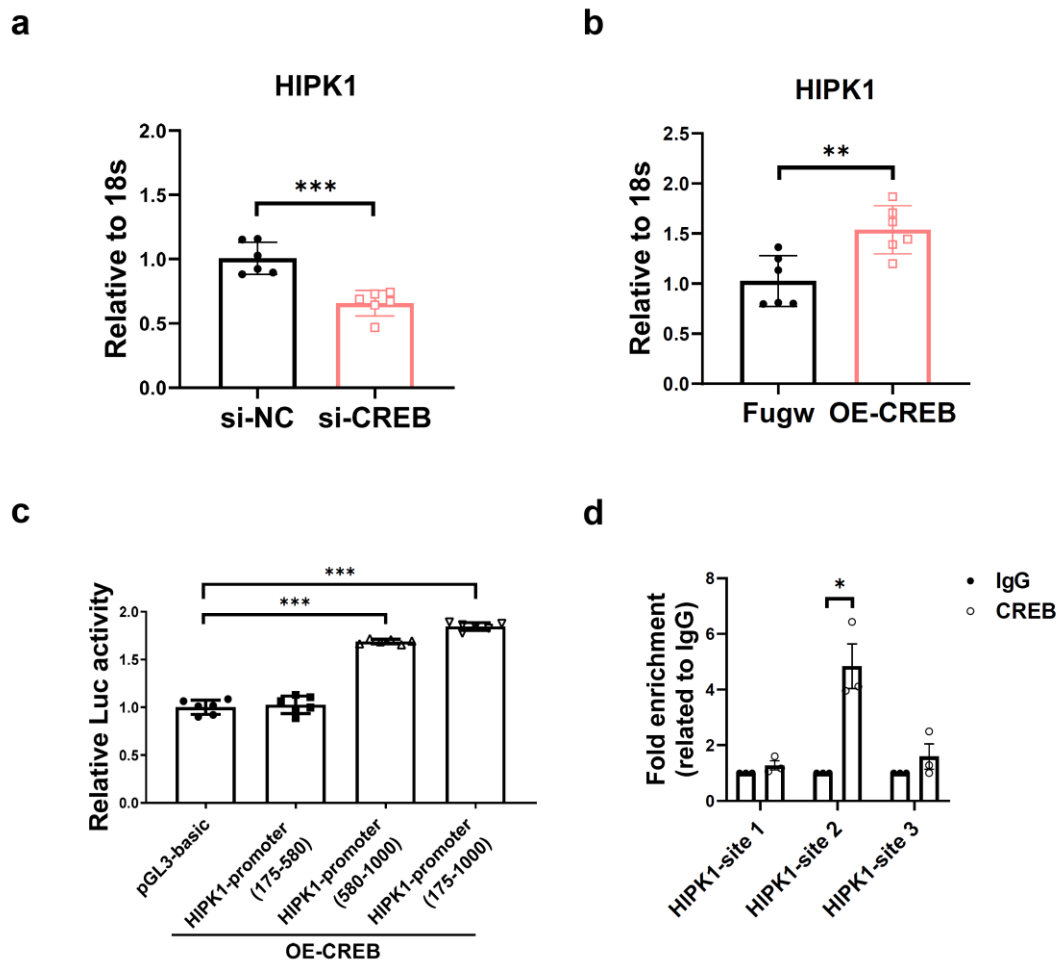

**Figure S18. CREB positively regulates HIPK1 in cardiomyocytes.** **a** and **b**, qRT-PCR for HIPK1 in neonatal rat cardiomyocytes (NRCM) transfected with CREB siRNA (si-CREB) and negative control (si-NC) (**a**, n=6), or with OE-CREB plasmid and Fugw control vector (**b**, n=6). **c**, Luciferase reporter assay for detection of the regulation between CREB and HIPK1 (n=6). **d**, ChIP-PCR assay for detection of the enrichment of CREB to the promoter region of HIPK1 (n=3). Data between 2 groups were compared by independent-sample two-tailed Student's t-test. Data among 4 groups were compared by one-way ANOVA test. \*,  $P < 0.05$ ; \*\*,  $P < 0.01$ ; \*\*\*,  $P < 0.001$ .

## Figure S19

### a HIPK1 KO-Founder-1:

Wild type: CAATCTTCCTGCTTACGACCAGGGCCTCCTTCTCCCAGCTCC

Mutant: CAATCTTCCTGC-----CTCCTTCTCCCAGCTCC

### b HIPK1 KO-Founder-2:

Wild type: CAATCTTCCTGCTTACG-ACCAGGGCCTCCTTCT

Mutant: CAATCTTCCTGCTTACGGACCAGGGCCTCCTTCT

c CAATCTTCCTGCTTACGACCAGGGCCTCCTTCTCCCAGCTCC

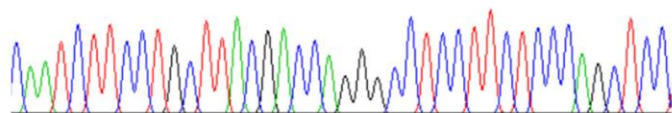

WT mice

d CAATCTTCCTGCCTCCTTCTCCCAGCTCC

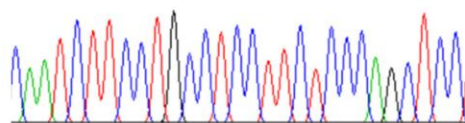

HIPK1 KO-Founder-1

e

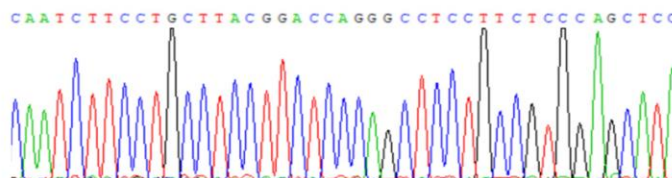

HIPK1 KO-Founder-2

**Figure S19. Generation and DNA sequences of HIPK1 knockout (KO) mice.** a, HIPK1 KO mice (Founder-1) was generated with 13 bp deletion before CTCCTTCTCCCAGCTCC in HIPK1 genomic DNA. b, HIPK1 KO mice (Founder-2) was generated with one G insertion before ACCAGGGCCTCCTTCT in HIPK1 genomic DNA. c-e, Genotypes were confirmed by DNA sequencing of tail DNA as demonstrated for wild type (WT) mice (c), Founder-1 (d) and Founder-2 (e), respectively.

Supplemental Tables

Table S1. Echocardiography parameters of wild type (WT) mice *versus* HIPK1 knockout (KO) mice (Line-1) at 4 weeks after TAC surgery.

|                         | WT+Sham<br>(n=7) | HIPK1 KO+Sham<br>(n=8) | WT+TAC 4w<br>(n=10) | HIPK1 KO+TAC 4w<br>(n=11) |
|-------------------------|------------------|------------------------|---------------------|---------------------------|
| <b>Heart rate (bpm)</b> | 470.20±41.25     | 487.30±41.93           | 474.20±50.57        | 478.90±33.39              |
| <b>EF (%)</b>           | 60.25±8.05       | 60.63±6.16             | 31.19±6.51***       | 54.63±5.58###             |
| <b>FS (%)</b>           | 31.74±5.23       | 31.81±4.20             | 14.54±3.34***       | 27.86±3.50###             |
| <b>LV Mass (mg)</b>     | 118.5±29.2       | 101.5±22.6             | 211.7±44.7***       | 135.3±15.9###             |
| <b>LVPW;s (mm)</b>      | 1.26±0.26        | 1.18±0.16              | 1.35±0.17           | 1.31±0.14                 |
| <b>LVPW;d (mm)</b>      | 0.88±0.19        | 0.80±0.14              | 1.19±0.20**         | 0.99±0.11 <sup>#</sup>    |
| <b>LVAW;s (mm)</b>      | 1.30±0.17        | 1.27±0.18              | 1.42±0.11           | 1.34±0.09                 |
| <b>LVAW;d (mm)</b>      | 0.88±0.18        | 0.87±0.16              | 1.20±0.13***        | 0.94±0.11 <sup>##</sup>   |
| <b>Diameter;s (mm)</b>  | 2.53±0.31        | 2.41±0.38              | 3.45±0.47***        | 2.69±0.29###              |
| <b>Diameter;d (mm)</b>  | 3.70±0.34        | 3.51±0.35              | 4.03±0.44           | 3.72±0.27                 |
| <b>Volume;s (μL)</b>    | 23.42±6.69       | 21.14±7.80             | 50.56±16.81***      | 27.15±7.39###             |
| <b>Volume;d (μL)</b>    | 58.71±12.53      | 52.10±12.03            | 72.55±19.12         | 59.21±10.51               |

BPM, beat per minute; EF, ejection fraction; FS, fractional shortening; LV, left ventricle; LVPW;s, end-systolic LV posterior wall thickness; LVPW;d, end-diastolic LV posterior wall thickness; LVAW;s, end-systolic LV anterior wall thickness; LVAW;d, end-diastolic LV anterior wall

thickness; Diameter;s, end-systolic LV diameter; Diameter;d, end-diastolic LV diameter; Volume;s, end-systolic LV volume; Volume;d, end-diastolic LV volume. Data are presented as mean±SD. Data among 4 groups were compared by two-way ANOVA test followed by Tukey post hoc test. \*\*,  $P<0.01$  compared to corresponding Sham group; \*\*\*,  $P<0.001$  compared to corresponding Sham group; ##,  $P<0.01$  compared to WT+TAC group; ###,  $P<0.001$  compared to WT+TAC group.

**Table S2. Echocardiography parameters of wild type (WT) mice *versus* HIPK1 knockout (KO) mice (Line-1) at 8 weeks after TAC surgery.**

|                         | <b>WT+Sham<br/>(n=13)</b> | <b>HIPK1 KO+Sham<br/>(n=9)</b> | <b>WT+TAC<br/>(n=13)</b> | <b>HIPK1 KO+TAC<br/>(n=9)</b> |
|-------------------------|---------------------------|--------------------------------|--------------------------|-------------------------------|
| <b>Heart rate (bpm)</b> | 498.20±40.52              | 458.00±43.84                   | 488.80±40.54             | 447.40±43.11                  |
| <b>EF (%)</b>           | 58.44±6.46                | 54.62±5.76                     | 36.83±8.98***            | 48.79±5.86 <sup>##</sup>      |
| <b>FS (%)</b>           | 30.46±4.31                | 27.91±3.76                     | 17.59±4.74***            | 24.38±3.49 <sup>##</sup>      |
| <b>LV Mass (mg)</b>     | 110.9±14.3                | 99.8±17.6                      | 168.2±30.5***            | 118.0±22.1 <sup>###</sup>     |
| <b>LVPW;s (mm)</b>      | 1.12±0.20                 | 1.01±0.15                      | 1.15±0.25                | 0.99±0.09                     |
| <b>LVPW;d (mm)</b>      | 0.82±0.16                 | 0.73±0.05                      | 0.99±0.20*               | 0.75±0.07 <sup>##</sup>       |
| <b>LVAW;s (mm)</b>      | 1.29±0.20                 | 1.19±0.17                      | 1.36±0.30                | 1.16±0.19                     |
| <b>LVAW;d (mm)</b>      | 0.85±0.13                 | 0.78±0.14                      | 1.08±0.24*               | 0.83±0.15 <sup>#</sup>        |
| <b>Diameter;s (mm)</b>  | 2.62±0.39                 | 2.74±0.23                      | 3.33±0.45***             | 3.06±0.29                     |
| <b>Diameter;d (mm)</b>  | 3.75±0.37                 | 3.80±0.22                      | 4.03±0.34                | 4.04±0.22                     |
| <b>Volume;s (μL)</b>    | 25.89±9.14                | 28.28±5.69                     | 46.28±15.71***           | 37.21±8.78                    |
| <b>Volume;d (μL)</b>    | 60.75±13.88               | 62.15±8.59                     | 71.76±14.59              | 71.94±9.34                    |

BPM, beat per minute; EF, ejection fraction; FS, fractional shortening; LV, left ventricle; LVPW;s, end-systolic LV posterior wall thickness; LVPW;d, end-diastolic LV posterior wall thickness; LVAW;s, end-systolic LV anterior wall thickness; LVAW;d, end-diastolic LV anterior wall



thickness; Diameter;s, end-systolic LV diameter; Diameter;d, end-diastolic LV diameter; Volume;s, end-systolic LV volume; Volume;d, end-diastolic LV volume. Data are presented as mean±SD. Data among 4 groups were compared by two-way ANOVA test followed by Tukey post hoc test. \*,  $P<0.05$  compared to corresponding Sham group; \*\*\*,  $P<0.001$  compared to corresponding Sham group; #,  $P<0.05$  compared to WT+TAC group; ##,  $P<0.01$  compared to WT+TAC group; ###,  $P<0.001$  compared to WT+TAC group.

**Table S3. Echocardiography parameters of wild type (WT) mice *versus* HIPK1 knockout (KO) mice (Line-2) at 6 weeks after TAC surgery.**

|                         | <b>WT+Sham<br/>(n=5)</b> | <b>HIPK1-KO-2+Sham<br/>(n=5)</b> | <b>WT+TAC<br/>(n=6)</b> | <b>HIPK1-KO-2+TAC<br/>(n=8)</b> |
|-------------------------|--------------------------|----------------------------------|-------------------------|---------------------------------|
| <b>Heart rate (bpm)</b> | 461.5±32.8               | 448.3±24.7                       | 455.6±34.7              | 461.3±21.6                      |
| <b>EF (%)</b>           | 58.73±3.44               | 57.91±3.51                       | 28.45±7.13***           | 49.32±4.32*,###                 |
| <b>FS (%)</b>           | 30.71±2.28               | 30.14±2.30                       | 13.42±3.58***           | 24.58±2.49**,###                |
| <b>LV Mass (mg)</b>     | 141.2±22.1               | 106.7±10.9                       | 240.2±21.2***           | 131.2±24.7###                   |
| <b>LVPW;s (mm)</b>      | 1.24±0.04                | 1.16±0.18                        | 1.24±0.05               | 1.10±0.12                       |
| <b>LVPW;d (mm)</b>      | 0.94±0.11                | 0.74±0.16                        | 1.06±0.03               | 0.88±0.13 <sup>#</sup>          |
| <b>LVAW;s (mm)</b>      | 1.35±0.16                | 1.18±0.08                        | 1.18±0.22               | 1.27±0.06                       |
| <b>LVAW;d (mm)</b>      | 0.85±0.08                | 0.74±0.06                        | 0.95±0.17               | 0.90±0.06 <sup>#</sup>          |
| <b>Diameter;s (mm)</b>  | 2.81±0.34                | 2.82±0.18                        | 4.45±0.48***            | 2.94±0.33###                    |
| <b>Diameter;d (mm)</b>  | 4.05±0.47                | 4.03±0.16                        | 5.13±0.41***            | 3.89±0.33###                    |
| <b>Volume;s (μL)</b>    | 30.35±8.81               | 30.10±4.71                       | 91.20±21.98***          | 33.89±8.96###                   |
| <b>Volume;d (μL)</b>    | 73.23±19.68              | 71.27±6.92                       | 126.30±22.39***         | 66.09±13.08###                  |

BPM, beat per minute; EF, ejection fraction; FS, fractional shortening; LV, left ventricle; LVPW;s, end-systolic LV posterior wall thickness; LVPW;d, end-diastolic LV posterior wall thickness; LVAW;s, end-systolic LV anterior wall thickness; LVAW;d, end-diastolic LV anterior wall

thickness; Diameter;s, end-systolic LV diameter; Diameter;d, end-diastolic LV diameter; Volume;s, end-systolic LV volume; Volume;d, end-diastolic LV volume. Data are presented as mean±SD. Data among 4 groups were compared by two-way ANOVA test followed by Tukey post hoc test. \*,  $P<0.05$  compared to corresponding Sham group; \*\*,  $P<0.01$  compared to corresponding Sham group; \*\*\*,  $P<0.001$  compared to corresponding Sham group; #,  $P<0.05$  compared to WT+TAC group; ###,  $P<0.001$  compared to WT+TAC group.

**Table S4. Echocardiography parameters of mice injected with cTnT-shHIPK1-AAV9 versus control AAV9 at 6 weeks after TAC surgery.**

|                         | <b>cTnT-CTL-<br/>AAV9+Sham<br/>(n=11)</b> | <b>cTnT-shHIPK1-<br/>AAV9+Sham<br/>(n=11)</b> | <b>cTnT-CTL-<br/>AAV9+TAC<br/>(n=11)</b> | <b>cTnT-shHIPK1-<br/>AAV9+TAC<br/>(n=10)</b> |
|-------------------------|-------------------------------------------|-----------------------------------------------|------------------------------------------|----------------------------------------------|
| <b>Heart rate (bpm)</b> | 504.6±43.2                                | 508.9±37.9                                    | 497.3±46.3                               | 492.4±45.6                                   |
| <b>EF (%)</b>           | 59.82±3.92                                | 58.69±4.72                                    | 38.50±5.46***                            | 48.07±8.35***,##                             |
| <b>FS (%)</b>           | 31.31±2.52                                | 30.5±3.07                                     | 18.38±2.90***                            | 23.99±4.72***,##                             |
| <b>LV Mass (mg)</b>     | 111.6±20.9                                | 111.5±20.8                                    | 181.4±26.8***                            | 136.9±30.5##                                 |
| <b>LVPW;s (mm)</b>      | 1.12±0.13                                 | 1.13±0.13                                     | 1.30±0.17*                               | 1.07±0.18##                                  |
| <b>LVPW;d (mm)</b>      | 0.76±0.09                                 | 0.76±0.12                                     | 1.04±0.14***                             | 0.82±0.14##                                  |
| <b>LVAW;s (mm)</b>      | 1.31±0.16                                 | 1.36±0.13                                     | 1.39±0.13                                | 1.31±0.30                                    |
| <b>LVAW;d (mm)</b>      | 0.89±0.15                                 | 0.93±0.14                                     | 1.17±0.10***                             | 0.97±0.21#                                   |
| <b>Diameter;s (mm)</b>  | 2.59±0.27                                 | 2.56±0.33                                     | 3.22±0.26***                             | 3.03±0.36**                                  |
| <b>Diameter;d (mm)</b>  | 3.77±0.27                                 | 3.68±0.34                                     | 3.94±0.25                                | 3.98±0.32                                    |
| <b>Volume;s (μL)</b>    | 24.92±6.81                                | 24.41±8.48                                    | 41.92±7.91***                            | 36.72±10.77*                                 |
| <b>Volume;d (μL)</b>    | 61.23±10.65                               | 58.13±13.35                                   | 67.93±10.29                              | 69.89±12.41                                  |

BPM, beat per minute; EF, ejection fraction; FS, fractional shortening; LV, left ventricle; LVPW;s, end-systolic LV posterior wall thickness; LVPW;d, end-diastolic LV posterior wall thickness; LVAW;s, end-systolic LV anterior wall thickness; LVAW;d, end-diastolic LV anterior wall

thickness; Diameter;s, end-systolic LV diameter; Diameter;d, end-diastolic LV diameter; Volume;s, end-systolic LV volume; Volume;d, end-diastolic LV volume. Data are presented as mean±SD. Data among 4 groups were compared by two-way ANOVA test followed by Tukey post hoc test. \*,  $P<0.05$  compared to corresponding Sham group; \*\*,  $P<0.01$  compared to corresponding Sham group; \*\*\*,  $P<0.001$  compared to corresponding Sham group; #,  $P<0.05$  compared to WT+TAC group; ##,  $P<0.01$  compared to WT+TAC group.

**Table S5. Echocardiography parameters of wild type (WT) versus HIPK1 hetero-knockout mice at 8 weeks after TAC surgery.**

|                         | <b>WT+Sham<br/>(n=6)</b> | <b>HIPK1<sup>+/-</sup>+Sham<br/>(n=6)</b> | <b>WT+TAC<br/>(n=5)</b> | <b>HIPK1<sup>+/-</sup>+TAC<br/>(n=5)</b> |
|-------------------------|--------------------------|-------------------------------------------|-------------------------|------------------------------------------|
| <b>Heart rate (bpm)</b> | 505.9±20.2               | 504.9±29.3                                | 477.2±53.3              | 508.1±14.6                               |
| <b>EF (%)</b>           | 57.65±1.50               | 58.86±2.24                                | 35.43±6.93***           | 43.71±3.21***,#                          |
| <b>FS (%)</b>           | 29.88±0.89               | 30.47±1.42                                | 16.76±3.74***           | 21.23±1.82***,#                          |
| <b>LV Mass (mg)</b>     | 143±27.3                 | 125.9±21.7                                | 192.8±43.2              | 163.9±27.0                               |
| <b>LVPW;s (mm)</b>      | 1.32±0.23                | 1.30±0.31                                 | 1.32±0.18               | 1.42±0.20                                |
| <b>LVPW;d (mm)</b>      | 0.97±0.22                | 0.98±0.33                                 | 1.16±0.19               | 1.17±0.23                                |
| <b>LVAW;s (mm)</b>      | 1.37±0.07                | 1.34±0.07                                 | 1.40±0.13               | 1.28±0.06                                |
| <b>LVAW;d (mm)</b>      | 0.89±0.07                | 0.92±0.06                                 | 1.11±0.08***            | 0.94±0.09 <sup>#</sup>                   |
| <b>Diameter;s (mm)</b>  | 2.77±0.20                | 2.50±0.18                                 | 3.30±0.30**             | 3.04±0.14**                              |
| <b>Diameter;d (mm)</b>  | 3.95±0.25                | 3.59±0.20                                 | 3.97±0.30               | 3.86±0.15                                |
| <b>Volume;s (μL)</b>    | 29.06±5.28               | 22.51±3.90                                | 44.74±9.31**            | 36.19±4.08**                             |
| <b>Volume;d (μL)</b>    | 68.38±10.34              | 54.45±7.17                                | 69.22±11.77             | 64.29±6.04                               |

BPM, beat per minute; EF, ejection fraction; FS, fractional shortening; LV, left ventricle; LVPW;s, end-systolic LV posterior wall thickness; LVPW;d, end-diastolic LV posterior wall thickness; LVAW;s, end-systolic LV anterior wall thickness; LVAW;d, end-diastolic LV anterior wall

thickness; Diameter;s, end-systolic LV diameter; Diameter;d, end-diastolic LV diameter; Volume;s, end-systolic LV volume; Volume;d, end-diastolic LV volume. Data are presented as mean±SD. Data among 4 groups were compared by two-way ANOVA test followed by Tukey post hoc test. \*\*,  $P<0.01$  compared to corresponding Sham group; \*\*\*,  $P<0.001$  compared to corresponding Sham group; #,  $P<0.05$  compared to WT+TAC group.

**Table S6. Echocardiography parameters of mice injected with cTnT-shHIPK1-AAV9 and/or cTnT-CREB-AAV9 at 6 weeks after TAC surgery.**

|                         | <b>cTnT-CTL-<br/>AAV9+TAC<br/>(n=9)</b> | <b>cTnT-CREB-<br/>AAV9+TAC<br/>(n=7)</b> | <b>cTnT-shHIPK1-<br/>AAV9+TAC<br/>(n=8)</b> | <b>cTnT-shHIPK1-AAV9+<br/>cTnT-CREB-AAV9+TAC<br/>(n=10)</b> |
|-------------------------|-----------------------------------------|------------------------------------------|---------------------------------------------|-------------------------------------------------------------|
| <b>Heart rate (bpm)</b> | 490.9±32.3                              | 506.1±34.1                               | 492.8±23.0                                  | 492.4±30.5                                                  |
| <b>EF (%)</b>           | 37.85±6.00                              | 30.84±4.33                               | 51.5±6.77***                                | 35.83±4.65###                                               |
| <b>FS (%)</b>           | 17.98±3.19                              | 14.32±2.20                               | 25.97±4.06***                               | 16.95±2.48###                                               |
| <b>LV Mass (mg)</b>     | 195.1±35.7                              | 201.9±34.8                               | 128.9±38.2**                                | 215.7±38.7###                                               |
| <b>LVPW;s (mm)</b>      | 1.33±0.10                               | 1.31±0.18                                | 1.13±0.19                                   | 1.39±0.30                                                   |
| <b>LVPW;d (mm)</b>      | 1.13±0.13                               | 1.14±0.17                                | 0.84±0.15*                                  | 1.23±0.29##                                                 |
| <b>LVAW;s (mm)</b>      | 1.53±0.14                               | 1.42±0.29                                | 1.32±0.16                                   | 1.46±0.15                                                   |
| <b>LVAW;d (mm)</b>      | 1.26±0.16                               | 1.19±0.23                                | 0.93±0.16**                                 | 1.20±0.14#                                                  |
| <b>Diameter;s (mm)</b>  | 3.14±0.29                               | 3.46±0.31                                | 2.86±0.47                                   | 3.36±0.31#                                                  |
| <b>Diameter;d (mm)</b>  | 3.82±0.24                               | 4.03±0.31                                | 3.85±0.48                                   | 4.04±0.32                                                   |
| <b>Volume;s (μL)</b>    | 39.62±8.88                              | 49.85±10.59                              | 32.37±12.63                                 | 46.52±10.20#                                                |
| <b>Volume;d (μL)</b>    | 63.19±9.46                              | 71.84±13.08                              | 65.20±19.47                                 | 72.13±13.49                                                 |

BPM, beat per minute; EF, ejection fraction; FS, fractional shortening; LV, left ventricle; LVPW;s, end-systolic LV posterior wall thickness;



LVPW;d, end-diastolic LV posterior wall thickness; LVAW;s, end-systolic LV anterior wall thickness; LVAW;d, end-diastolic LV anterior wall thickness; Diameter;s, end-systolic LV diameter; Diameter;d, end-diastolic LV diameter; Volume;s, end-systolic LV volume; Volume;d, end-diastolic LV volume. Data are presented as mean±SD. Data among 4 groups were compared by two-way ANOVA test followed by Tukey post hoc test. \*,  $P<0.05$  compared to corresponding Sham group; \*\*,  $P<0.01$  compared to corresponding Sham group; \*\*\*,  $P<0.001$  compared to corresponding Sham group; #,  $P<0.05$  compared to WT+TAC group; ##,  $P<0.01$  compared to WT+TAC group; ###,  $P<0.001$  compared to WT+TAC group.

**Table S7. List of PCR primers**

| <b>Gene</b>                            | <b>Primer sequence</b>    |
|----------------------------------------|---------------------------|
| rno-HIPK1-Forward                      | CAGCATCAGCCAATCATC        |
| rno-HIPK1-Reverse                      | ATTAGACCTCGCCTTCAG        |
| rno-cTnI-Forward                       | ATGGCGGATGAGAGCAG         |
| rno-cTnI -Reverse                      | GTTTTCTGGAGGCGGAGA        |
| rno-cTnT-Forward                       | GCCATCGACCACCTGAATGA      |
| rno-cTnT-Reverse                       | TTTGGCCTTCCCACGAGTTT      |
| rno-ANP-Forward                        | GAGCAAATCCCGTATACAGTGC    |
| rno-ANP-Reverse                        | ATCTTCTACCGGCATCTTCTCC    |
| rno-BNP-Forward                        | CTGCTTGCGGAGGCGAGAC       |
| rno-BNP-Reverse                        | TGTTCTGGAGACTGGCTAGGACTTC |
| rno- $\beta$ -MHC-Forward              | TCCAGCTGAAAGCAGAAAGAG     |
| rno- $\beta$ -MHC-Reverse              | CCTGGGAGATGAACGCATAAT     |
| rno-Col1a1-Forward                     | GAGCGGAGAGTACTGGATCGA     |
| rno-Col1a1-Reverse                     | TGCCATTGCTGGAGTTGGA       |
| rno-Col3a1-Forward                     | TGCCATTGCTGGAGTTGGA       |
| rno-Col3a1-Reverse                     | GAAGACATGATCTCCTCAGTGTTGA |
| rno-C/EBP $\beta$ -Forward             | CAAGCTGAGCGACGAGTACAA     |
| rno-C/EBP $\beta$ -Reverse             | ACAGCTGCTCCACCTTCTTCT     |
| rno-CREB-Forward                       | TTCCACTTCTGCCCTCAC        |
| rno-CREB-Reverse                       | GGTCTCCTCATGGTTCCTG       |
| rno-skeletal $\alpha$ -actinin-Forward | GGTTATGCCCTGCCACA         |
| rno-skeletal $\alpha$ -actinin-Reverse | GCGCACAATCTCACGTTC        |
| rno-cardiac $\alpha$ -actinin-Forward  | CCAACCGTGAGAAGATGAC       |
| rno-cardiac $\alpha$ -actinin-Reverse  | GTCGCCAGAATCCAGAAC        |
| rno- $\alpha$ -MHC-Forward             | CAGCTCAGTCAGGCCAATAGAA    |
| rno- $\alpha$ -MHC-Reverse             | CGTTCCTACACTCCTGCACC      |
| rno-SERCA2a-Forward                    | TGGCAGCAGACTTAGGAAA       |
| rno-SERCA2a-Reverse                    | AGGGAGTGGCAAACCAA         |
| mmu-HIPK1-Forward                      | AATCTTCCTGCTTACGGAC       |
| mmu-HIPK1-Reverse                      | CTCACTCTTTCTCTTCAATCC     |
| mmu-ANP-Forward                        | AGCCGTTGCGAGAACTTGTCTT    |
| mmu-ANP-Reverse                        | CAGGTTATTGCCACTTAGGTTCA   |
| mmu-BNP-Forward                        | GAGTCCTTCGGTCTCAAGGC      |
| mmu-BNP-Reverse                        | TACAGCCCAAACGACTGACG      |
| mmu- $\beta$ -MHC-Forward              | CTTCAACCACCACATGTTCG      |
| mmu- $\beta$ -MHC-Reverse              | TCTCGATGAGGTCAATGCAG      |
| mmu-Col1a1-Forward                     | CAGAGGCGAAGGCAACA         |
| mmu-Col1a1-Reverse                     | GTCCAAGGGAGCCACATC        |
| mmu-Col3a1-Forward                     | AGAACCTGGCCGAGATG         |
| mmu-Col3a1-Reverse                     | TGGACTTCCGGGCATAC         |
| mmu-CTGF-Forward                       | TAAGACCTGTGGGATGGG        |
| mmu-CTGF-Reverse                       | GCAGCCAGAAAGCTCAA         |
| mmu-C/EBP $\beta$ -Forward             | GCCAACTTCTACTACGAGCCC     |

---

|                                        |                       |
|----------------------------------------|-----------------------|
| mmu-C/EBP $\beta$ -Reverse             | ACTCGTCGCTCAGCTTGTC   |
| mmu-CREB-Forward                       | AAAACCTCCTAAACCCCAAGC |
| mmu-CREB-Reverse                       | GCCTACCATCAAAACACATCT |
| mmu-skeletal $\alpha$ -actinin-Forward | AAGACGAGACCACCGCTCT   |
| mmu-skeletal $\alpha$ -actinin-Reverse | ACACCGTCCCCAGAATCCAAC |
| mmu-cardiac $\alpha$ -actinin-Forward  | ATGTGTGACGACGAGGAGAC  |
| mmu-cardiac $\alpha$ -actinin-Reverse  | GCCATGTTCAATGGGGTACT  |
| mmu- $\alpha$ -MHC-Forward             | CAGAGAACGGGGAGTTGG    |
| mmu- $\alpha$ -MHC-Reverse             | CTTGGCCTTGCCTTCCT     |
| mmu-SERCA2a-Forward                    | GGCAGGATGAGGATGTGA    |
| mmu-SERCA2a-Reverse                    | CTGGGCTGAAGGGCTTA     |
| rno/mmu-18s-Forward                    | TCAAGAACGAAAGTCGGAGG  |
| rno/mmu-18s-Reverse                    | GGACATCTAAGGGCATCAC   |

---
